# Supplementary material
Source: ML conference proceedings conference paper supplement (https://openreview.net/forum?id=L2W4wQsNkY)
Supplement: supplementary_material [file 63.pdf › q&a/63.pdf]

### [63] perspective

Question: if facing the nearest red chair to the cameraview, and turn left by 90 degree, which side is the nearest computer? left or right

Answer Choices: ['right', 'left']

Correct Answer: right

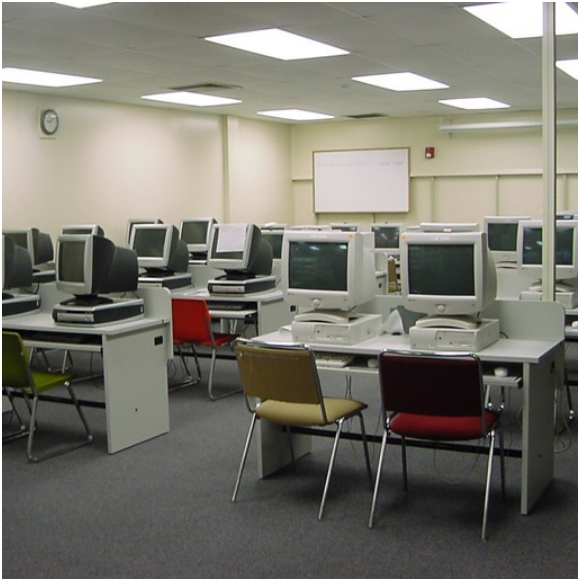

### LLM Response

LLM Response: right (correct)

### LLM Prompt

#### System Prompt

You are an AI assistant designed to help with spatial reasoning in a 3D indoor scene. You must analyze any provided images or observations and answer the question.

Rules:

1. You should output the exact answer from the choices.
2. You will be provided with multiple imagined views if you taking corresponding actions to help you answer the questions.
3. You can include minimal reasoning, but your final line must only include the exact answer choice.

### User Prompt

These are the images that pair with the question.

Image 1:

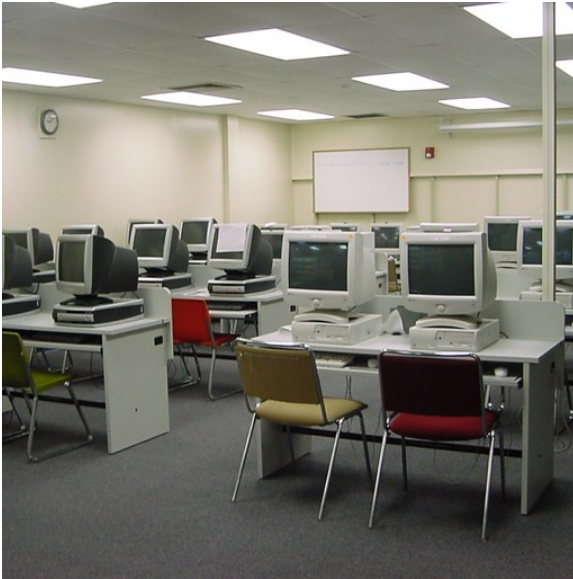

Image 1 is your current egocentric view

Question: if facing the nearest red chair to the cameraview, and turn left by 90 degree, which side is the nearest computer? left or right

Answer Choices:

- right
- left

Below are the imagined views you would obtain if you took the corresponding actions. These are provided to help you answer the question.

You can include them in your reasoning, but you should still only output the exact answer at the last line

Action: turn left

turn left 18 degrees

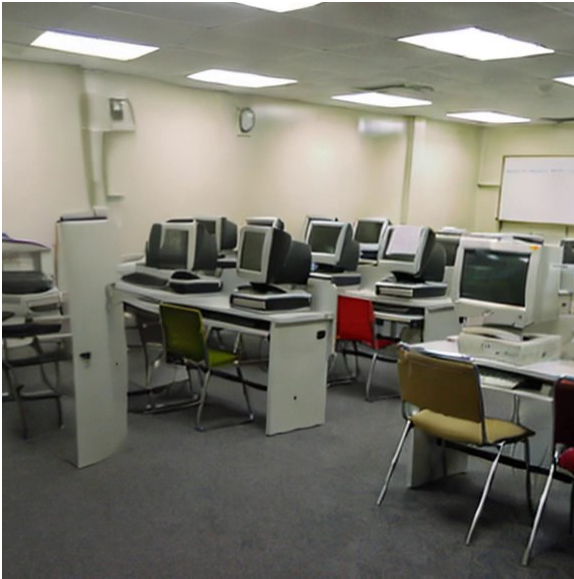

turn left 27 degrees

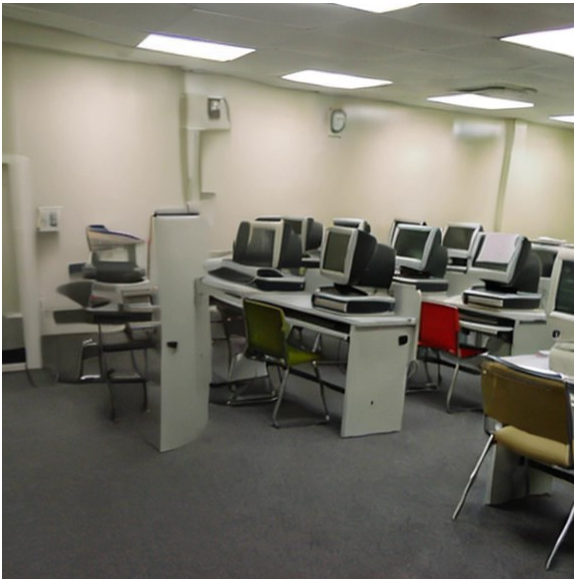

Action: turn left 18 degrees, and then move forward

turn left 18 degrees, and then move forward 0.5 meters

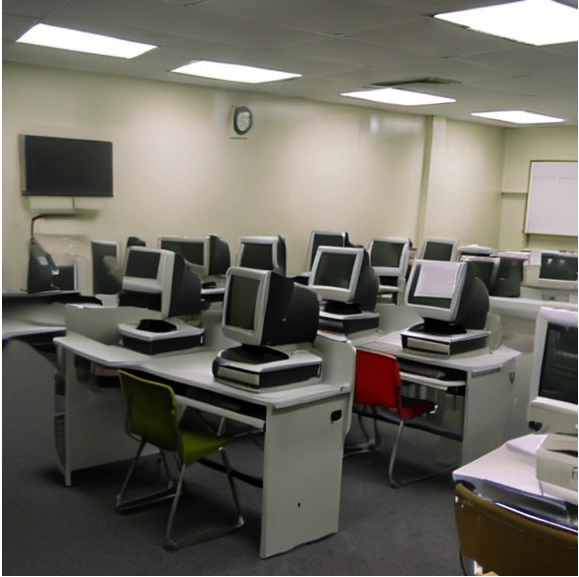

turn left 18 degrees, and then move forward 0.75 meters

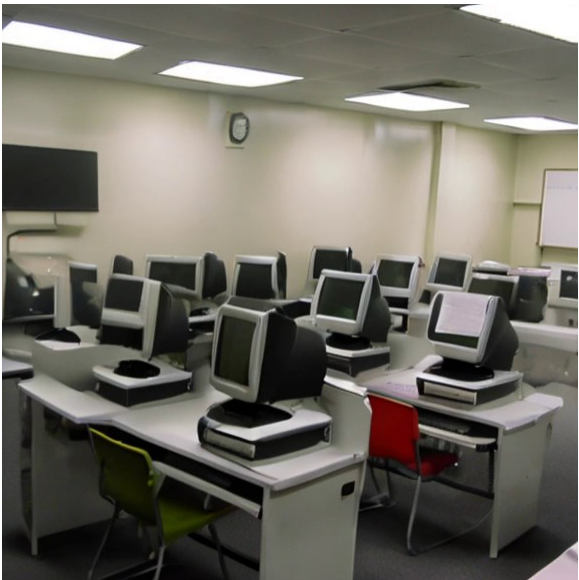

Action: turn left 9 degrees, and then move forward

turn left 9 degrees, and then move forward 0.75 meters

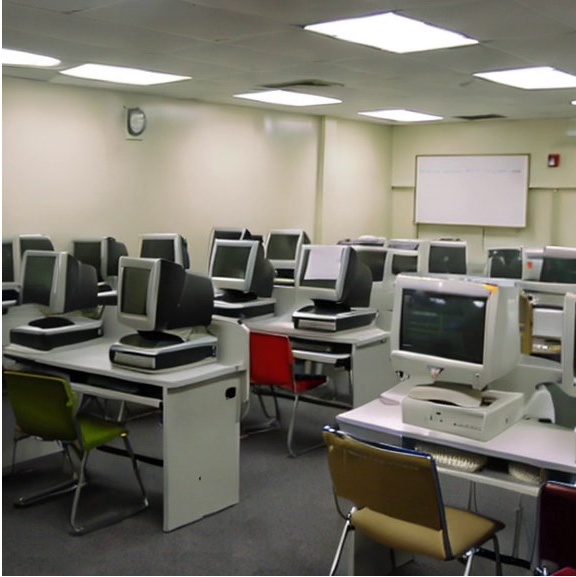

Action: turn left 18 degrees, move forward 0.75 meters, and then turn left

turn left 18 degrees, move forward 0.75 meters, and then turn left 18 degrees

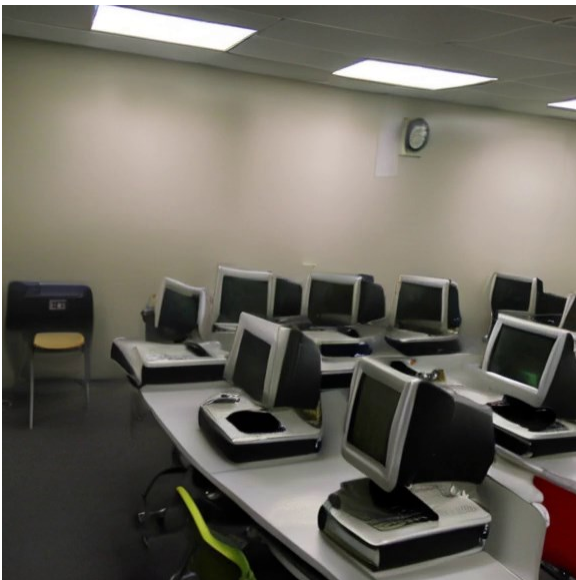

Output the exact answer from the choices.

Answer:
