# Supplementary material
Source: ML conference proceedings conference paper supplement (https://openreview.net/forum?id=L2W4wQsNkY)
Supplement: supplementary_material [file 213.pdf › q&a/213.pdf]

### [213] obj\_movement

Question: Were any of the objects in the initial frame that you can still see in the second frame moved from their original positions?

Answer Choices: ['no objects moved', 'ArmChair was moved right and towards the camera in the first frame']

Correct Answer: no objects moved

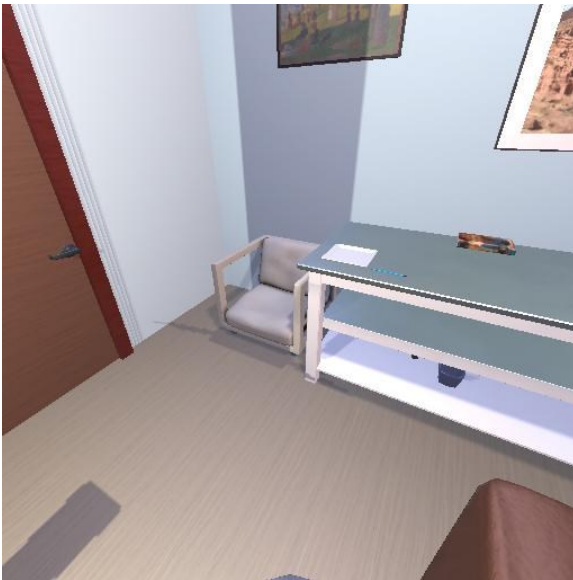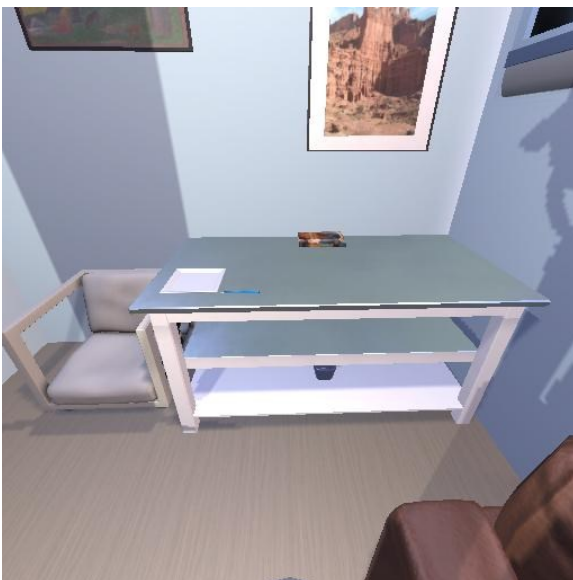

### LLM Response

LLM Response: no objects moved (correct)

## LLM Prompt

### System Prompt

You are an AI assistant designed to help with spatial reasoning in a 3D indoor scene. You must analyze any provided images or observations and answer the question.

Rules:

1. You should output the exact answer from the choices.
2. You will be provided with multiple imagined views if you taking corresponding actions to help you answer the questions.
3. You can include minimal reasoning, but your final line must only include the exact answer choice.

### User Prompt

These are the images that pair with the question.

Image 1:

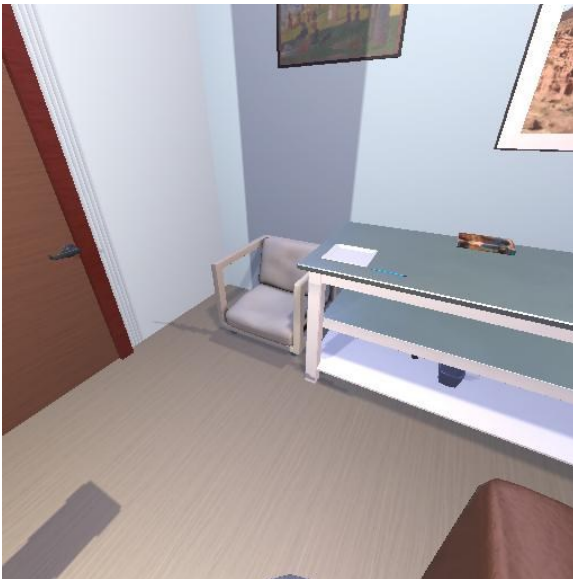

Image 2:

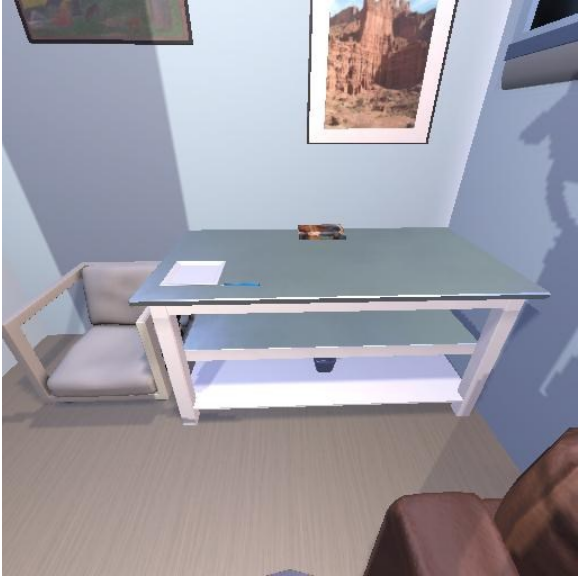

Image 1 is your current egocentric view

Question: Were any of the objects in the initial frame that you can still see in the second frame moved from their original positions?

Answer Choices:

- no objects moved
- ArmChair was moved right and towards the camera in the first frame

Below are the imagined views you would obtain if you took the corresponding actions.

These are provided to help you answer the question.

You can include them in your reasoning, but you should still only output the exact answer at the last line

Action: move forward

move forward 0.75 meters

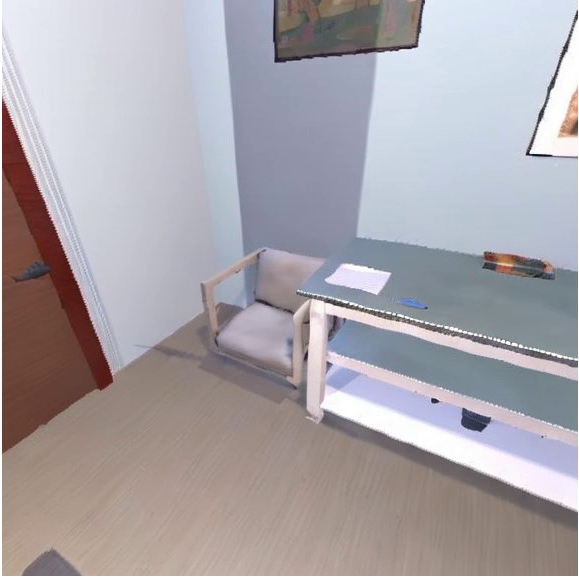

Action: turn right

turn right 27 degrees

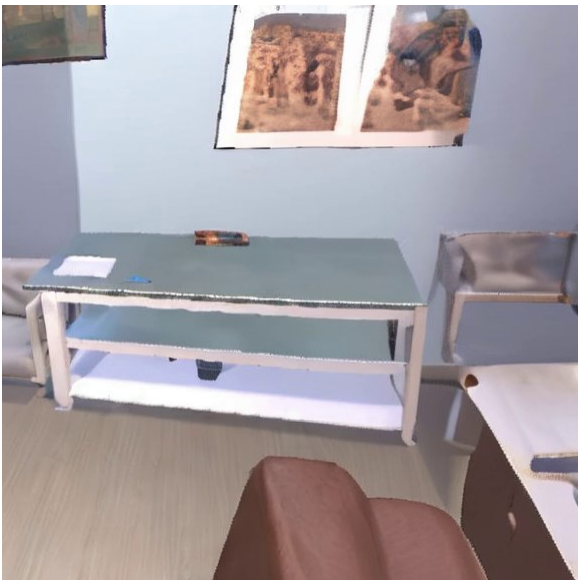

Action: turn right 18 degrees, and then move forward

turn right 18 degrees, and then move forward 0.75 meters

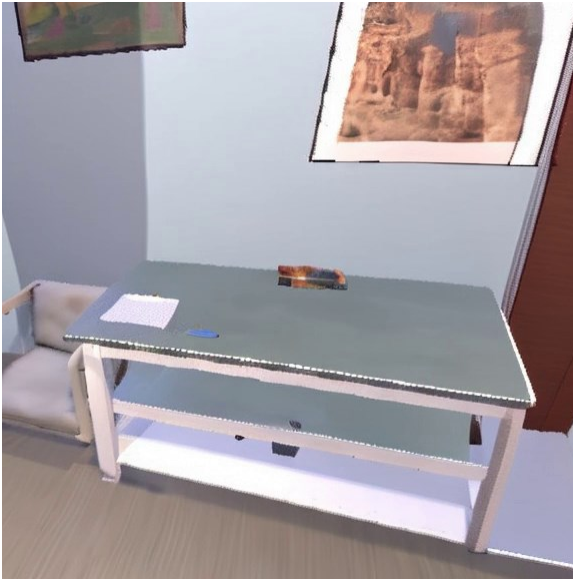

Output the exact answer from the choices.  
Answer:
